# Supplementary material for: Connectivity strength, time lag structure and the epilepsy network in resting-state fMRI
Source: PubMed Central journal article supplement — Neuroimage Clin. 2019 Oct 23;24:102035. doi: 10.1016/j.nicl.2019.102035 (PMC6881607; doi:10.1016/j.nicl.2019.102035), 2019-10-23
Supplement: mmc1.pdf [file mmc1.pdf]

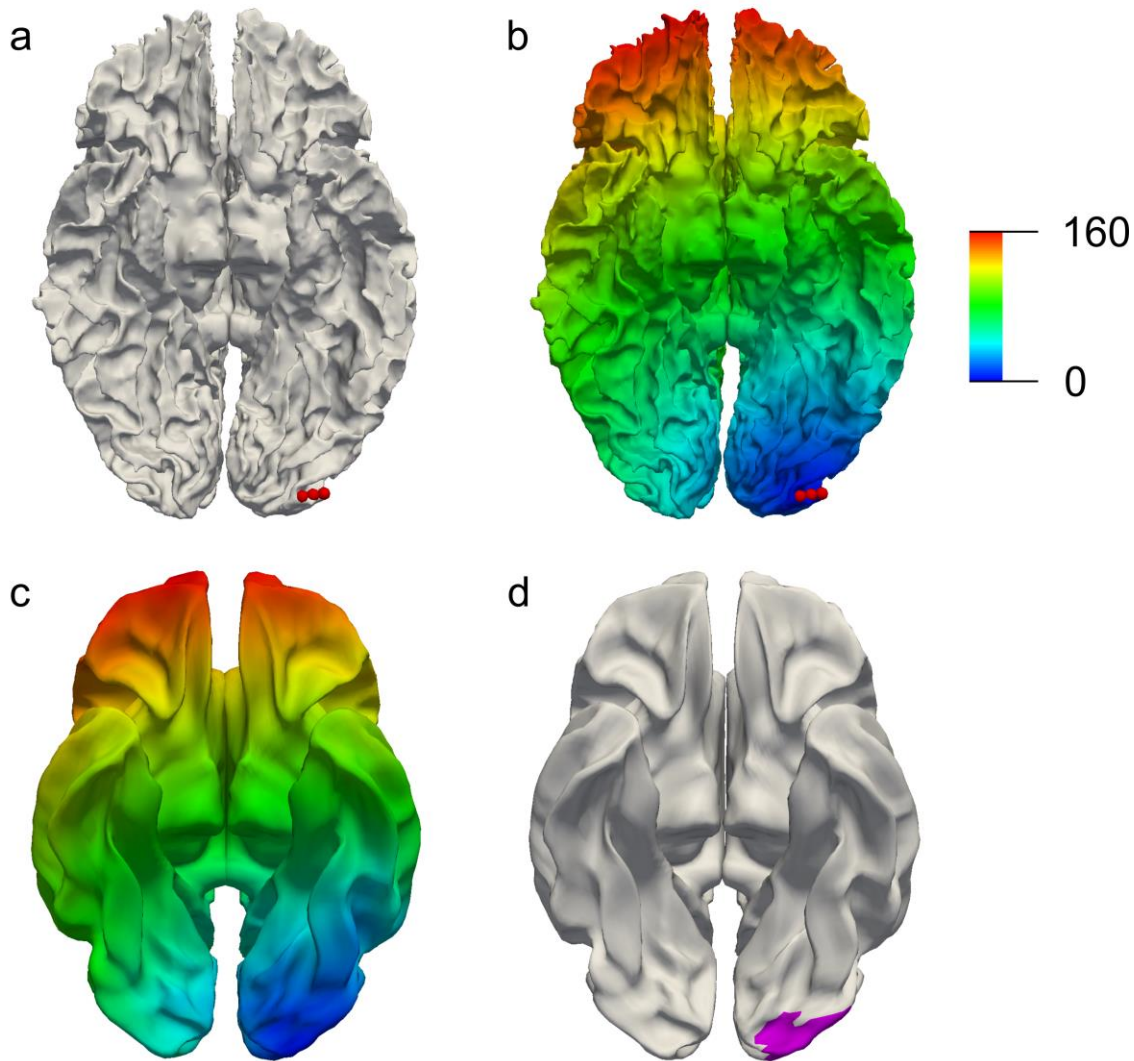

**Supporting Figure 1. Definition of regions of interest.** Graphical representation of the localization of regions of interest in atlas space. (a) Patient specific cortical surface and localized electrode contacts found to be responsible for seizure onset (red circles) as determined by post-operative CT merged with pre-operative MRI, distance map was defined in (b) individual space and then, (c) registered and mapped in common surface space (d) final epileptogenic zone was obtained by thresholding distance map at 10 mm (pink area).
